# Supplementary material for: Predictors of Plasma DDT and DDE Concentrations among Women Exposed to Indoor Residual Spraying for Malaria Control in the South African Study of Women and Babies (SOWB)
Source: Environ Health Perspect. 2014 Feb 21;122(6):545–52. doi: 10.1289/ehp.1307025 (PMC4048257; doi:10.1289/ehp.1307025)
Supplement: (240 KB) PDF [file ehp.1307025.s001.pdf]

## **Supplemental Material**

### **Predictors of Plasma DDT and DDE Concentrations among Women Exposed to Indoor Residual Spraying for Malaria Control in the South African Study of Women and Babies (SOWB)**

Kristina W. Whitworth, Riana M.S. Bornman, Janet I. Archer, Mwenda O. Kudumu, Gregory S. Travlos, Ralph E. Wilson, and Matthew P. Longnecker

| <b>Table of Contents</b>                                                                                                                                                                              | <b>Page</b> |
|-------------------------------------------------------------------------------------------------------------------------------------------------------------------------------------------------------|-------------|
| <b>Table S1.</b> Subset of housing variables which best predict plasma DDT levels among South African women in indoor residual spraying villages, based on forward stepwise linear regression model.  | 2           |
| <b>Table S2.</b> Factor loadings for the single retained factor from the factor analysis to discriminated between DDT and non-DDT sprayed households.                                                 | 3           |
| <b>Table S3.</b> Multivariable linear regression models of predictors of plasma ln(DDT) levels among South Africa women aged 20-30, 2010-2011, by exposure group, excluding influential observations. | 4           |
| <b>Table S4.</b> Multivariable linear regression models of predictors of plasma ln(DDE) levels among South Africa women aged 20-30, 2010-2011, by exposure group, excluding influential observations. | 7           |

**Table S1.** Subset of housing variables which best predict plasma DDT levels among South African women in indoor residual spraying villages, based on forward stepwise linear regression model.

| <b>Variable Name</b> | <b>Adj. R-Squared</b> | <b>AIC Value</b> | <b>p-value</b> |
|----------------------|-----------------------|------------------|----------------|
| Intercept            | 0.000                 | 357.10           | 1.00           |
| Compound             | 0.061                 | 343.40           | < 0.001        |
| Private Water Source | 0.080                 | 339.77           | 0.02           |
| Painted Walls        | 0.090                 | 338.12           | 0.06           |
| Dirt Walls           | 0.093                 | 338.45           | 0.20           |

Note: Potential variables also included: plaster walls, brick walls, metal walls, type of toilet, metal roof.

**Table S2.** Factor loadings for the single retained factor from the factor analysis to discriminated between DDT and non-DDT sprayed households.

| <b>Variable Name</b> | <b>Factor Loading</b> |
|----------------------|-----------------------|
| Compound             | 0.6693                |
| Dirt Walls           | 0.80776               |
| Painted Walls        | -0.49348              |
| Private Water Source | -0.19308              |

**Table S3.** Multivariable linear regression models of predictors of plasma ln(DDT) levels among South Africa women aged 20-30, 2010-2011, by exposure group, excluding influential observations (households in unsprayed villages, n = 128; non-DDT IRS households, n = 89; DDT IRS households, n = 80).

| <b>Predictor</b>           | <b>Unsprayed:<br/>% Change in DDT<br/>Levels (95% CI)<sup>a</sup></b> | <b>Unsprayed:<br/>Adj. R<sup>2</sup></b> | <b>non-DDT IRS:<br/>% Change in DDT<br/>Levels (95% CI)<sup>a</sup></b> | <b>non-DDT<br/>IRS:<br/>Adj. R<sup>2</sup></b> | <b>DDT IRS:<br/>% Change in DDT<br/>Levels (95% CI)<sup>a</sup></b> | <b>DDT<br/>IRS:<br/>Adj. R<sup>2</sup></b> |
|----------------------------|-----------------------------------------------------------------------|------------------------------------------|-------------------------------------------------------------------------|------------------------------------------------|---------------------------------------------------------------------|--------------------------------------------|
| <b>Education</b>           |                                                                       |                                          |                                                                         |                                                |                                                                     |                                            |
| ≤ 11 years                 | REF                                                                   |                                          | REF                                                                     |                                                | NS                                                                  |                                            |
| 12 years                   | -9 (-47, 55)                                                          |                                          | 6 (-41, 91)                                                             |                                                | NS                                                                  |                                            |
| > 12 years                 | -53 (-75, -11)                                                        | 0.02                                     | -61 (-84, -7)                                                           | 0.02                                           | NS                                                                  |                                            |
| <b>Parity</b>              |                                                                       |                                          |                                                                         |                                                |                                                                     |                                            |
| Nulliparous                | NS                                                                    |                                          | REF                                                                     |                                                | NS                                                                  |                                            |
| One                        | NS                                                                    |                                          | -59 (-80, -18)                                                          |                                                | NS                                                                  |                                            |
| > One                      | NS                                                                    |                                          | -23 (-63, 61)                                                           | 0.04                                           | NS                                                                  |                                            |
| <b>Livestock Ownership</b> |                                                                       |                                          |                                                                         |                                                |                                                                     |                                            |
| No                         | NS                                                                    |                                          | NS                                                                      |                                                | REF                                                                 |                                            |
| Yes                        | NS                                                                    |                                          | NS                                                                      |                                                | 65 (4, 161)                                                         | 0.04                                       |
| <b>Water Source</b>        |                                                                       |                                          |                                                                         |                                                |                                                                     |                                            |
| Public Tap                 | REF                                                                   |                                          | NS                                                                      |                                                | NS                                                                  |                                            |
| Piped to Yard/Home         | -68 (-81, -46)                                                        | 0.15                                     | NS                                                                      |                                                | NS                                                                  |                                            |
| <b>Ever do Farmwork</b>    |                                                                       |                                          |                                                                         |                                                |                                                                     |                                            |
| No                         | REF                                                                   |                                          | NS                                                                      |                                                | NS                                                                  |                                            |
| Yes                        | -37 (-64, 11)                                                         | 0.01                                     | NS                                                                      |                                                | NS                                                                  |                                            |

| <b>Predictor</b>                               | <b>Unsprayed:<br/>% Change in DDT<br/>Levels (95% CI)<sup>a</sup></b> | <b>Unsprayed:<br/>Adj. R<sup>2</sup></b> | <b>non-DDT IRS:<br/>% Change in DDT<br/>Levels (95% CI)<sup>a</sup></b> | <b>non-DDT<br/>IRS:<br/>Adj. R<sup>2</sup></b> | <b>DDT IRS:<br/>% Change in DDT<br/>Levels (95% CI)<sup>a</sup></b> | <b>DDT<br/>IRS:<br/>Adj. R<sup>2</sup></b> |
|------------------------------------------------|-----------------------------------------------------------------------|------------------------------------------|-------------------------------------------------------------------------|------------------------------------------------|---------------------------------------------------------------------|--------------------------------------------|
| <b>Occupational Pesticide Use</b>              |                                                                       |                                          |                                                                         |                                                |                                                                     |                                            |
| No                                             | NS                                                                    |                                          | NS                                                                      |                                                | REF                                                                 |                                            |
| Yes                                            | NS                                                                    |                                          | NS                                                                      |                                                | -37 (-66, 17)                                                       | 0.01                                       |
| <b>Butter Consumption</b>                      |                                                                       |                                          |                                                                         |                                                |                                                                     |                                            |
| < 1 time/month                                 | REF                                                                   |                                          | NS                                                                      |                                                | NS                                                                  |                                            |
| ≥ 1 time/month and < 1 time/day                | 163 (48, 367)                                                         |                                          | NS                                                                      |                                                | NS                                                                  |                                            |
| ≥ 1 time/day                                   | 83 (0, 236)                                                           | 0.04                                     | NS                                                                      |                                                | NS                                                                  |                                            |
| <b>Egg Consumption</b>                         |                                                                       |                                          |                                                                         |                                                |                                                                     |                                            |
| < 1 time/month                                 | REF                                                                   |                                          | NS                                                                      |                                                | NS                                                                  |                                            |
| 1-6 times/month                                | -24 (-56, 33)                                                         |                                          | NS                                                                      |                                                | NS                                                                  |                                            |
| > 6 times/month                                | -53 (-74, -14)                                                        | 0.02                                     | NS                                                                      |                                                | NS                                                                  |                                            |
| <b>Fish Consumption</b>                        |                                                                       |                                          |                                                                         |                                                |                                                                     |                                            |
| < 1 time/month                                 | REF                                                                   |                                          | NS                                                                      |                                                | NS                                                                  |                                            |
| 1-4 times/month                                | 34 (-19, 120)                                                         |                                          | NS                                                                      |                                                | NS                                                                  |                                            |
| > 4 times/month                                | 301 (33, 1110)                                                        | 0.01                                     | NS                                                                      |                                                | NS                                                                  |                                            |
| <b>Any Pesticide Touched Open Foods</b>        |                                                                       |                                          |                                                                         |                                                |                                                                     |                                            |
| No                                             | NA                                                                    |                                          | NS                                                                      |                                                | REF                                                                 |                                            |
| Yes                                            | NA                                                                    |                                          | NS                                                                      |                                                | 133 (6, 414)                                                        | 0.02                                       |
| <b>Any Pesticide Touched Covering on Foods</b> |                                                                       |                                          |                                                                         |                                                |                                                                     |                                            |
| No                                             | NA                                                                    |                                          | REF                                                                     |                                                | NS                                                                  |                                            |
| Yes                                            | NA                                                                    |                                          | 112 (16, 286)                                                           | 0.03                                           | NS                                                                  |                                            |

| <b>Predictor</b>                          | <b>Unsprayed:<br/>% Change in DDT<br/>Levels (95% CI)<sup>a</sup></b> | <b>Unsprayed:<br/>Adj. R<sup>2</sup></b> | <b>non-DDT IRS:<br/>% Change in DDT<br/>Levels (95% CI)<sup>a</sup></b> | <b>non-DDT<br/>IRS:<br/>Adj. R<sup>2</sup></b> | <b>DDT IRS:<br/>% Change in DDT<br/>Levels (95% CI)<sup>a</sup></b> | <b>DDT<br/>IRS:<br/>Adj. R<sup>2</sup></b> |
|-------------------------------------------|-----------------------------------------------------------------------|------------------------------------------|-------------------------------------------------------------------------|------------------------------------------------|---------------------------------------------------------------------|--------------------------------------------|
| <b>Number of Actions Taken Before IRS</b> |                                                                       |                                          |                                                                         |                                                |                                                                     |                                            |
| < 4                                       | NA                                                                    |                                          | REF                                                                     |                                                | NS                                                                  |                                            |
| 4-6                                       | NA                                                                    |                                          | 146 (35, 349)                                                           |                                                | NS                                                                  |                                            |
| > 6                                       | NA                                                                    |                                          | -5 (-49, 78)                                                            | 0.05                                           | NS                                                                  |                                            |

CI: Confidence Interval; REF: Reference; NS: Not Selected; NA: Not Applicable

Note: All models are adjusted for total lipids.

<sup>a</sup>Calculated using the following formula:  $[\exp(\beta)-1] \times 100$ .

**Table S4.** Multivariable linear regression models of predictors of plasma ln(DDE) levels among South Africa women aged 20-30, 2010-2011, by exposure group, excluding influential observations (households in unsprayed villages, n = 128; non-DDT IRS households, n = 89; DDT IRS households, n = 80).

| <b>Predictor</b>                  | <b>Unsprayed:<br/>% Change in DDT<br/>Levels (95% CI)<sup>a</sup></b> | <b>Unsprayed:<br/>Adj. R<sup>2</sup></b> | <b>non-DDT IRS:<br/>% Change in DDT<br/>Levels (95% CI)<sup>a</sup></b> | <b>non-DDT<br/>IRS:<br/>Adj. R<sup>2</sup></b> | <b>DDT IRS:<br/>% Change in DDT<br/>Levels (95% CI)<sup>a</sup></b> | <b>DDT<br/>IRS:<br/>Adj. R<sup>2</sup></b> |
|-----------------------------------|-----------------------------------------------------------------------|------------------------------------------|-------------------------------------------------------------------------|------------------------------------------------|---------------------------------------------------------------------|--------------------------------------------|
| <b>BMI (kg/m<sup>2</sup>)</b>     |                                                                       |                                          |                                                                         |                                                |                                                                     |                                            |
| < 21.6                            | NS                                                                    |                                          | NS                                                                      |                                                | REF                                                                 |                                            |
| 21.6-24.7                         | NS                                                                    |                                          | NS                                                                      |                                                | -51 (-70, -19)                                                      |                                            |
| 24.8-28.3                         | NS                                                                    |                                          | NS                                                                      |                                                | -41 (-67, 3)                                                        |                                            |
| ≥ 28.4                            | NS                                                                    |                                          | NS                                                                      |                                                | -52 (-73, -16)                                                      | 0.04                                       |
| <b>Parity</b>                     |                                                                       |                                          |                                                                         |                                                |                                                                     |                                            |
| Nulliparous                       | NS                                                                    |                                          | REF                                                                     |                                                | REF                                                                 |                                            |
| One                               | NS                                                                    |                                          | -63 (-81, -29)                                                          |                                                | -34 (-64, 24)                                                       |                                            |
| > One                             | NS                                                                    |                                          | -51 (-74, -8)                                                           | 0.06                                           | -73 (-86, -48)                                                      | 0.13                                       |
| <b>Livestock Ownership</b>        |                                                                       |                                          |                                                                         |                                                |                                                                     |                                            |
| No                                | NS                                                                    |                                          | NS                                                                      |                                                | REF                                                                 |                                            |
| Yes                               | NS                                                                    |                                          | NS                                                                      |                                                | 83 (22, 173)                                                        | 0.09                                       |
| <b>Water Source</b>               |                                                                       |                                          |                                                                         |                                                |                                                                     |                                            |
| Public Tap                        | REF                                                                   |                                          | NS                                                                      |                                                | NS                                                                  |                                            |
| Piped to Yard/Home                | -62 (-77, -37)                                                        | 0.09                                     | NS                                                                      |                                                | NS                                                                  |                                            |
| <b>Occupational Pesticide Use</b> |                                                                       |                                          |                                                                         |                                                |                                                                     |                                            |
| No                                | NS                                                                    |                                          | NS                                                                      |                                                | REF                                                                 |                                            |
| Yes                               | NS                                                                    |                                          | NS                                                                      |                                                | -37 (-61, -48)                                                      | 0.02                                       |

| <b>Predictor</b>                               | <b>Unsprayed:<br/>% Change in DDT<br/>Levels (95% CI)<sup>a</sup></b> | <b>Unsprayed:<br/>Adj. R<sup>2</sup></b> | <b>non-DDT IRS:<br/>% Change in DDT<br/>Levels (95% CI)<sup>a</sup></b> | <b>non-DDT<br/>IRS:<br/>Adj. R<sup>2</sup></b> | <b>DDT IRS:<br/>% Change in DDT<br/>Levels (95% CI)<sup>a</sup></b> | <b>DDT<br/>IRS:<br/>Adj. R<sup>2</sup></b> |
|------------------------------------------------|-----------------------------------------------------------------------|------------------------------------------|-------------------------------------------------------------------------|------------------------------------------------|---------------------------------------------------------------------|--------------------------------------------|
| <b>Butter Consumption</b>                      |                                                                       |                                          |                                                                         |                                                |                                                                     |                                            |
| < 1 time/month                                 | REF                                                                   |                                          | NS                                                                      |                                                | NS                                                                  |                                            |
| ≥ 1 time/month and < 1 time/day                | 118 (23, 286)                                                         |                                          | NS                                                                      |                                                | NS                                                                  |                                            |
| ≥ 1 time/day                                   | 74 (-3, 214)                                                          | 0.03                                     | NS                                                                      |                                                | NS                                                                  |                                            |
| <b>Fish Consumption</b>                        |                                                                       |                                          |                                                                         |                                                |                                                                     |                                            |
| < 1 time/month                                 | NS                                                                    |                                          | NS                                                                      |                                                | REF                                                                 |                                            |
| 1-4 times/month                                | NS                                                                    |                                          | NS                                                                      |                                                | -35 (-58, 0)                                                        |                                            |
| > 4 times/month                                | NS                                                                    |                                          | NS                                                                      |                                                | -43 (-67, -3)                                                       | 0.02                                       |
| <b>Milk Consumption</b>                        |                                                                       |                                          |                                                                         |                                                |                                                                     |                                            |
| < 1 time/month                                 | NS                                                                    |                                          | REF                                                                     |                                                | NS                                                                  |                                            |
| 1-4 times/month                                | NS                                                                    |                                          | -9 (-47, 55)                                                            | 0.03                                           | NS                                                                  |                                            |
| > 4 times/month                                | NS                                                                    |                                          | -51 (-72, -13)                                                          |                                                | NS                                                                  |                                            |
| <b>Meat Consumption</b>                        |                                                                       |                                          |                                                                         |                                                |                                                                     |                                            |
| < 1 time/month                                 | NS                                                                    |                                          | REF                                                                     |                                                | NS                                                                  |                                            |
| 1-4 times/month                                | NS                                                                    |                                          | -32 (-59, 14)                                                           |                                                | NS                                                                  |                                            |
| > 4 times/month                                | NS                                                                    |                                          | -39 (-70, 21)                                                           |                                                | NS                                                                  |                                            |
| <b>Any Pesticide Touched Covering on Foods</b> |                                                                       |                                          |                                                                         |                                                |                                                                     |                                            |
| No                                             | NA                                                                    |                                          | REF                                                                     |                                                | NS                                                                  |                                            |
| Yes                                            | NA                                                                    |                                          | 73 (-1, 201)                                                            |                                                | NS                                                                  |                                            |

CI: Confidence Interval; REF: Reference; NS: Not Selected; NA: Not Applicable

Note: All models are adjusted for total lipids.

<sup>a</sup>Calculated using the following formula:  $[\exp(\beta)-1] \times 100$ .
